# Supplementary material for: Space-time clustering of climate extremes amplify global climate impacts, leading to fat-tailed risk
Source: Copernicus journal article supplement (doi:10.5194/nhess-2019-405), 2020-03-23
Supplement: Supplementary file 1 [file nhess-2019-405-supplement.pdf]

## Supplementary Material

### Figures

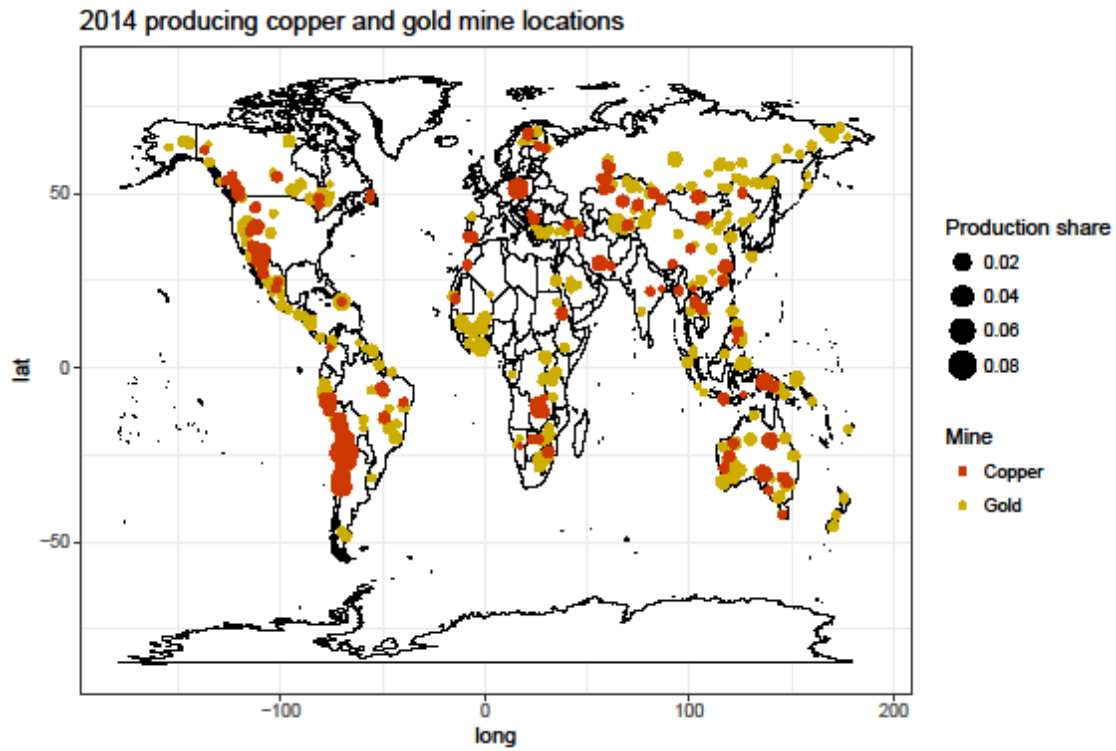

5

*Figure S1: 2014 copper and gold producing mine locations (top) and 2014 copper and gold producing mine locations with size proportional to production (bottom)*

100 largest cities in 2006

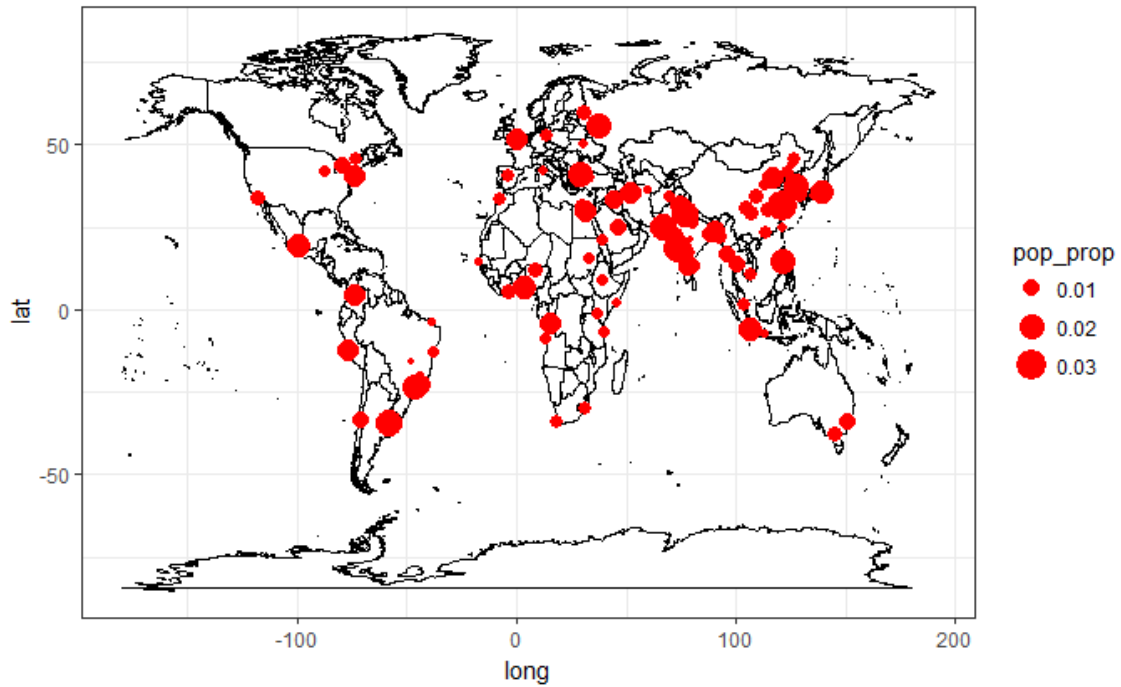

Figure S2: Location of the 100 largest cities in the world in 2006

Maize production geographical distribution

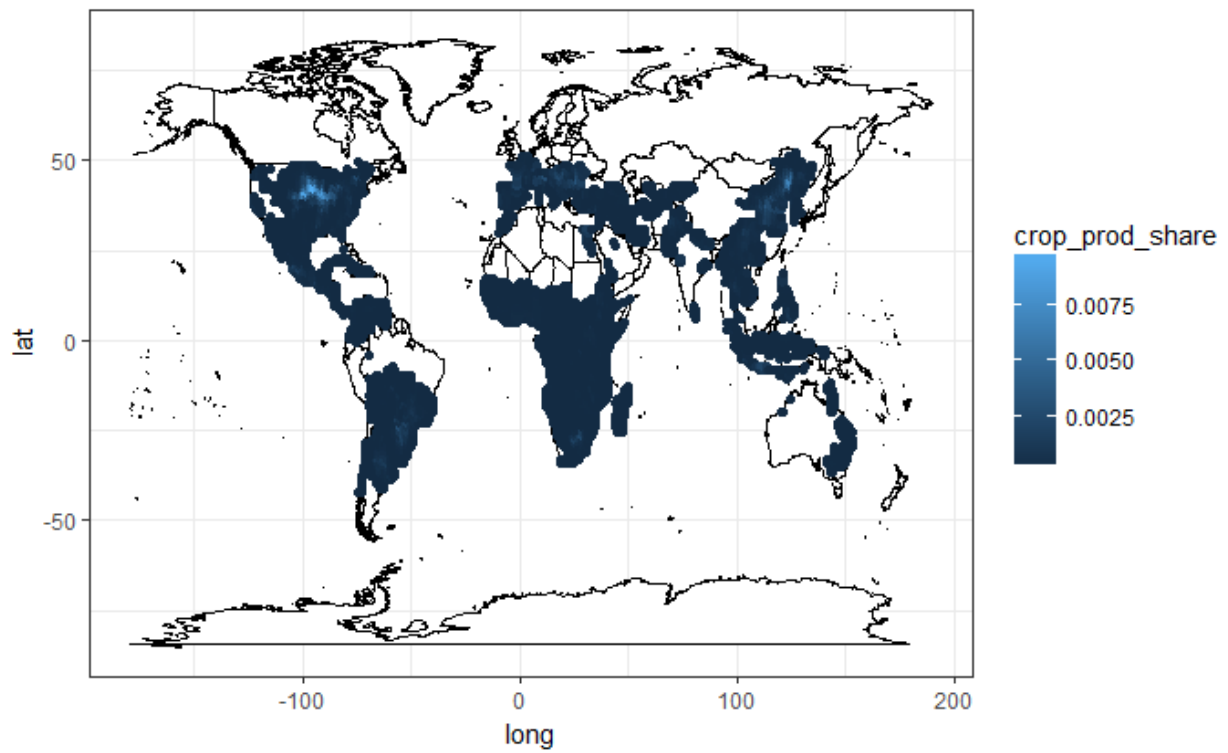

Figure S3: 2011 Maize production distribution

Rice production geographical distribution

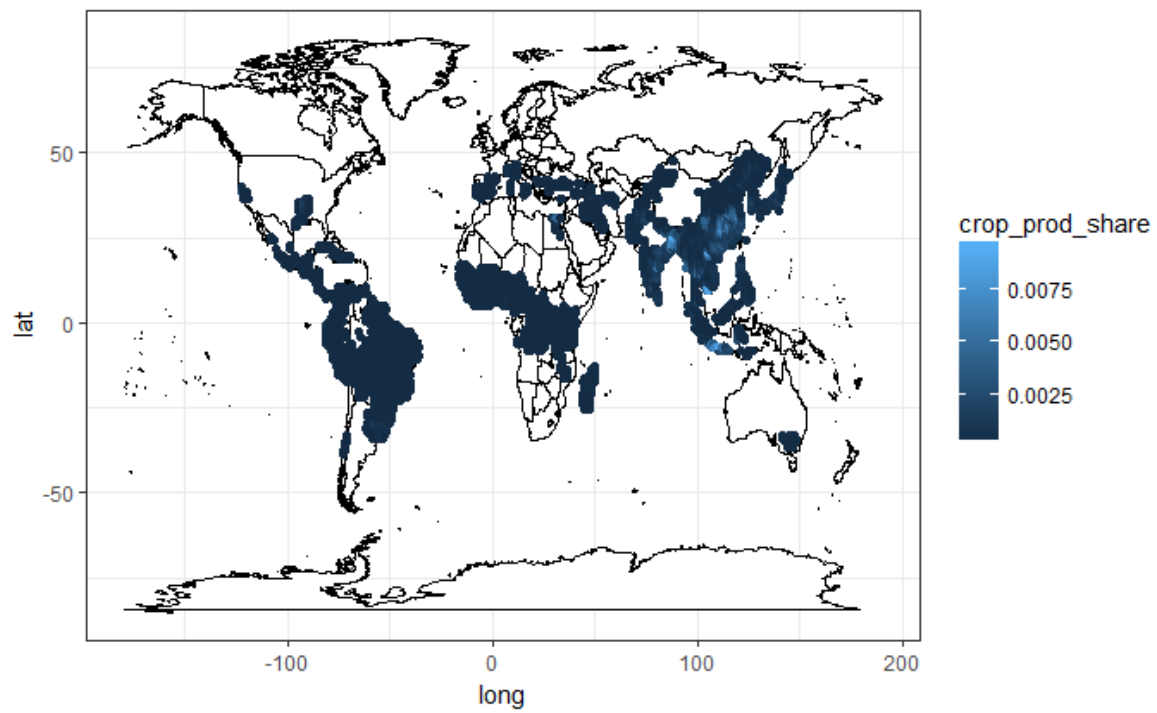

Figure S4: 2011 Rice production distribution

Soybean production geographical distribution

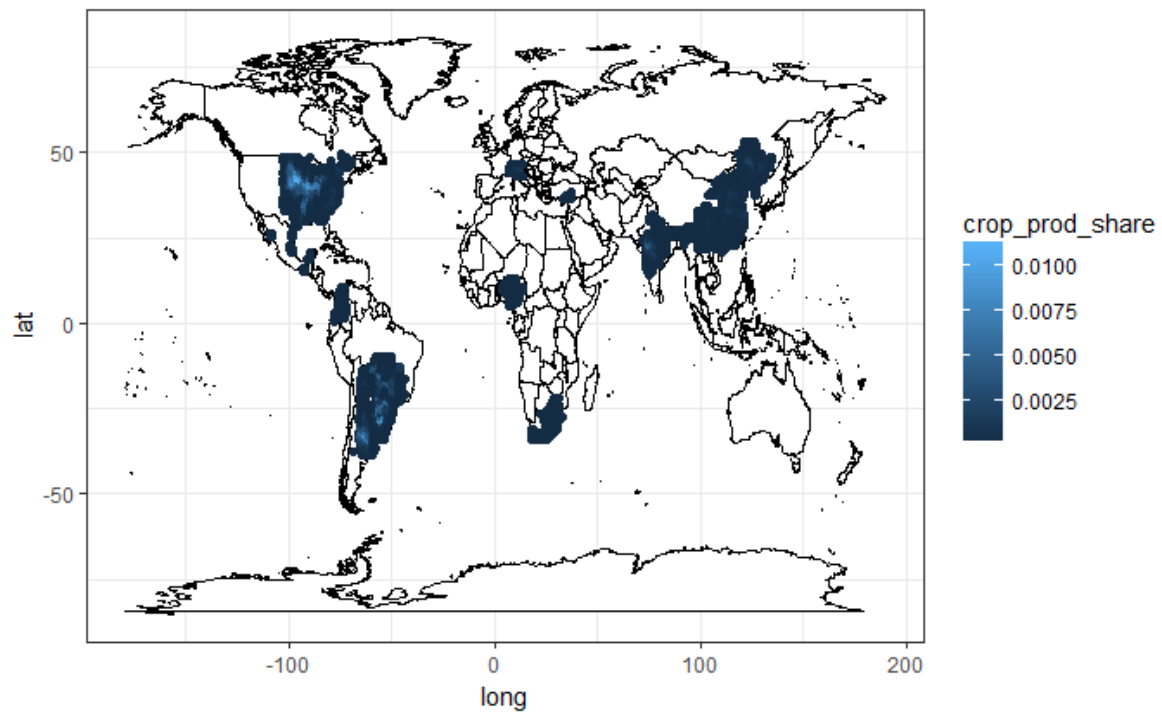

Figure S5: 2011 Soybean production distribution

Wheat production geographical distribution

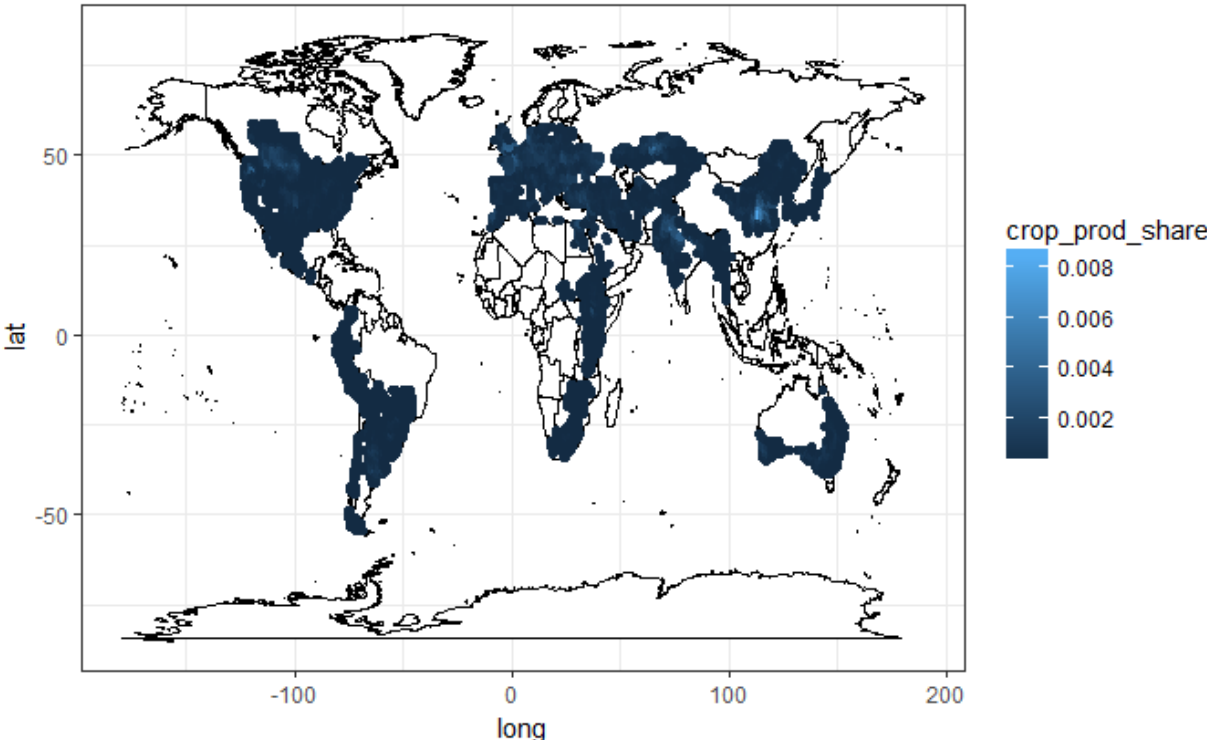

Figure S6: 2011 Wheat production distribution

Time series of the proportion of the land area between 30°N and 15°N affected by a 12-month event with a 10-year return level

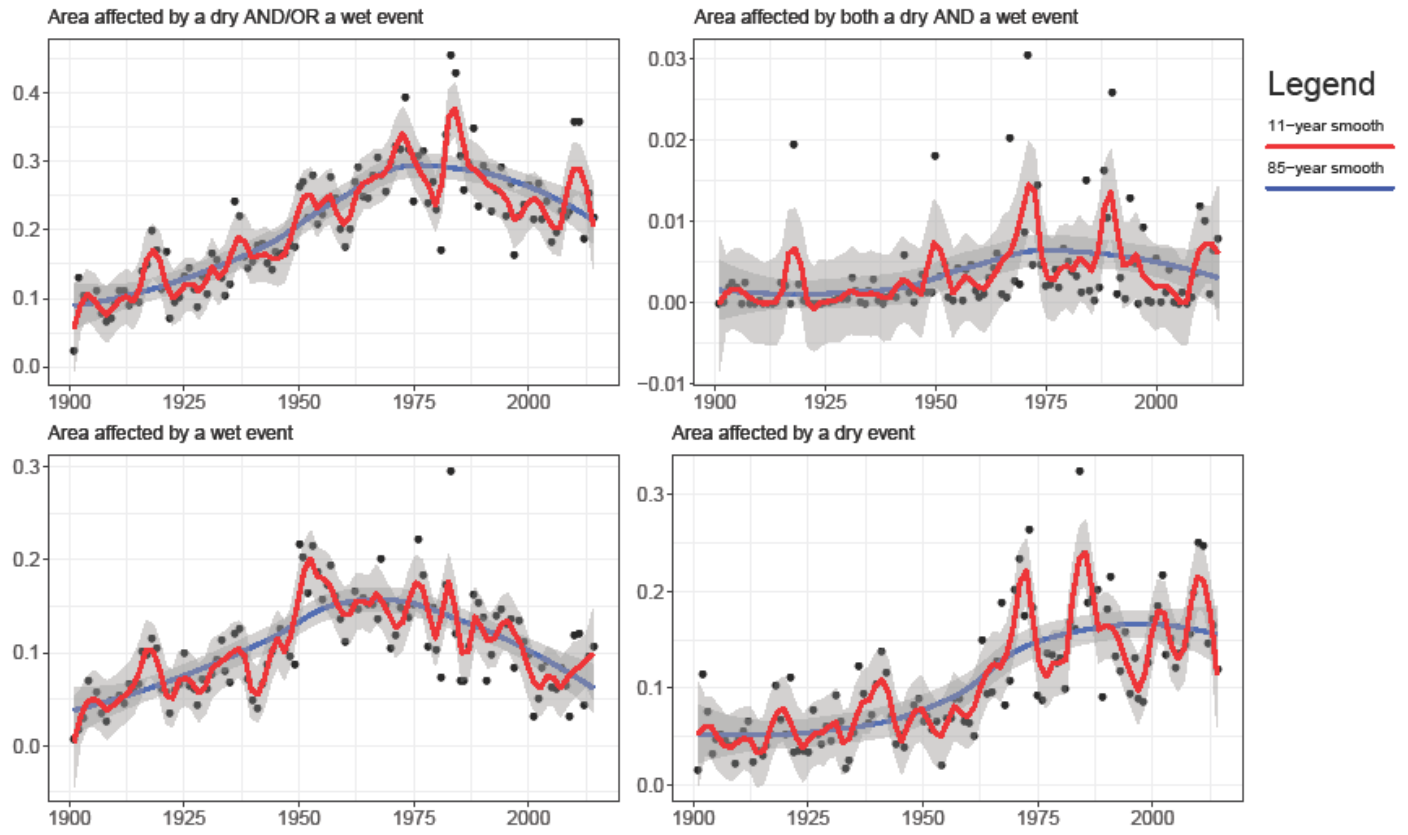

Figure S7: Northern sub-tropical area proportion affected by a 10-year, 12-month, wet or dry (top left), wet and dry (top right), wet (bottom left), and dry (bottom right)

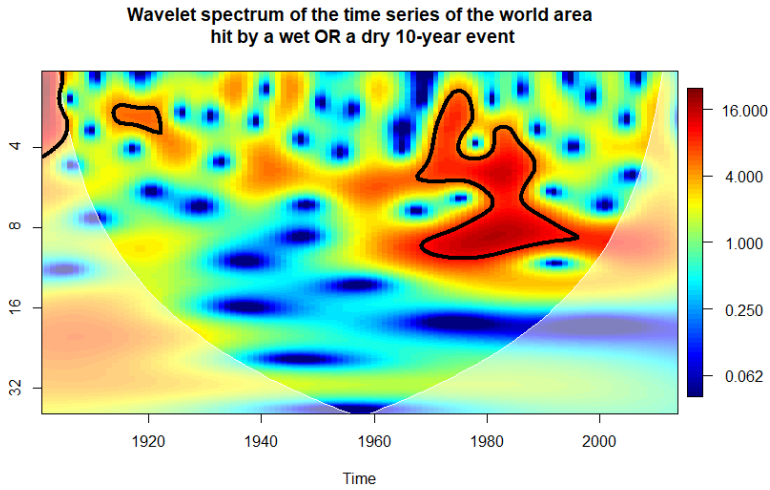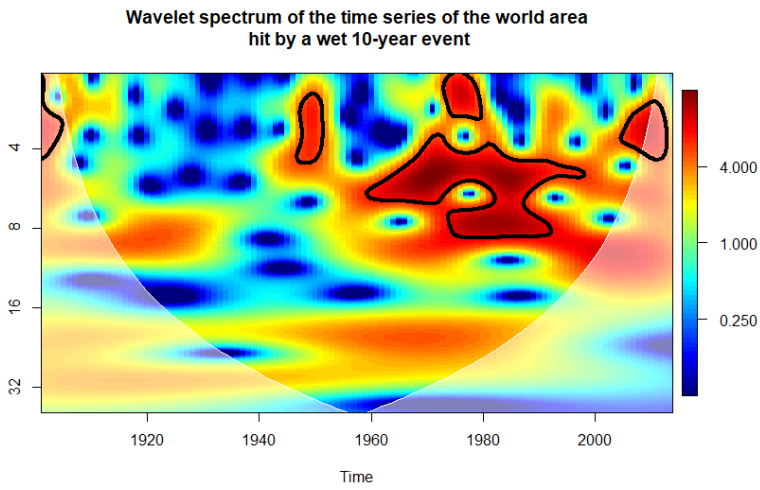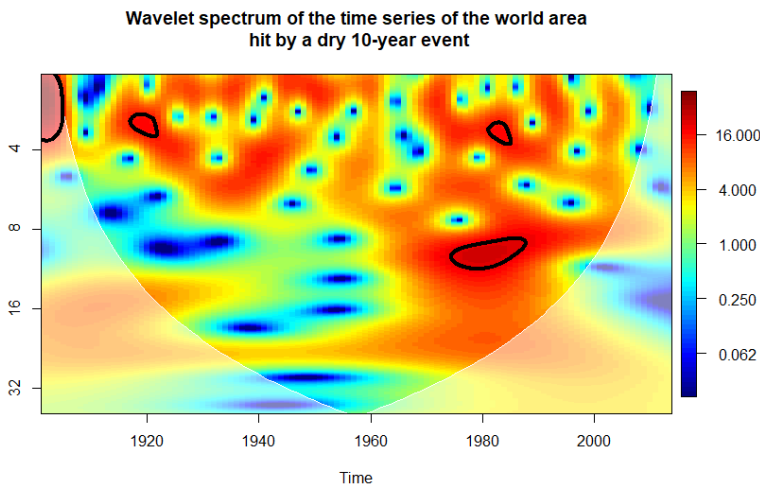

5 *Figure S8: 2011 Wavelet spectra of the yearly time series of world areas hit by a 10-year wet or dry (top), wet (middle) or dry (bottom) event*

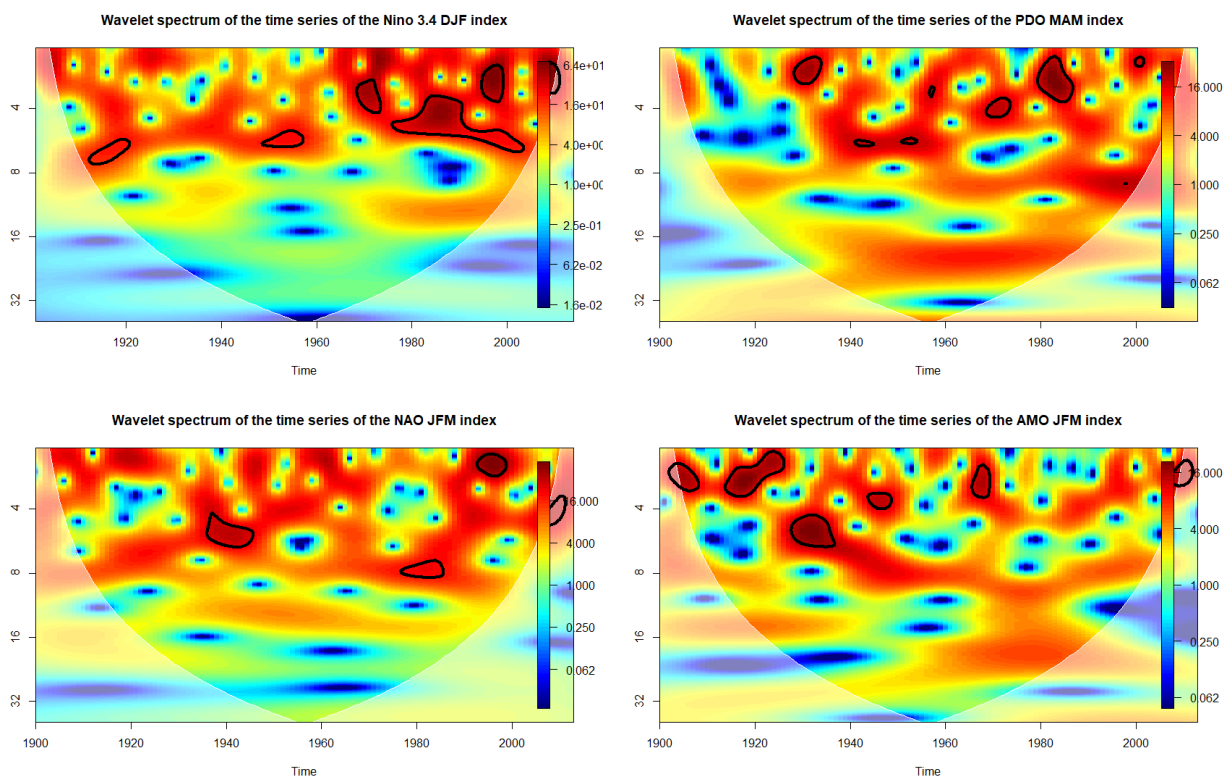

5

Figure S9: Wavelet spectra of Nino 3.4 DJF (top left), PDO MAM (top right), NAO JFM (bottom right), AMO JFM (bottom right) indexes

10

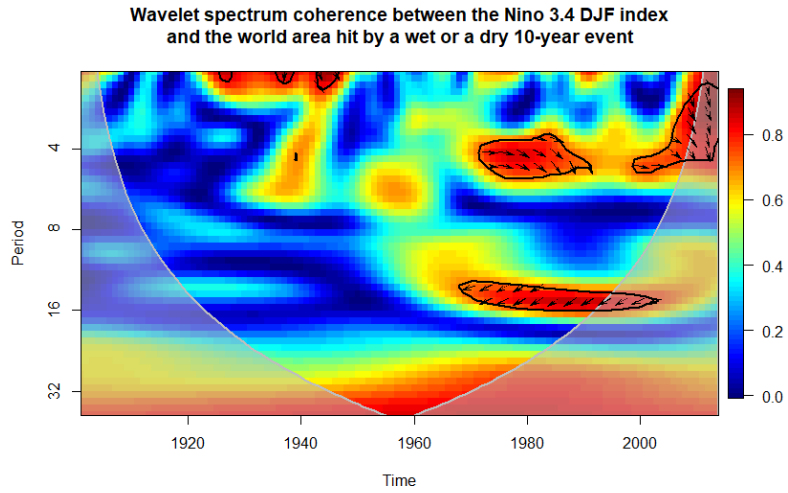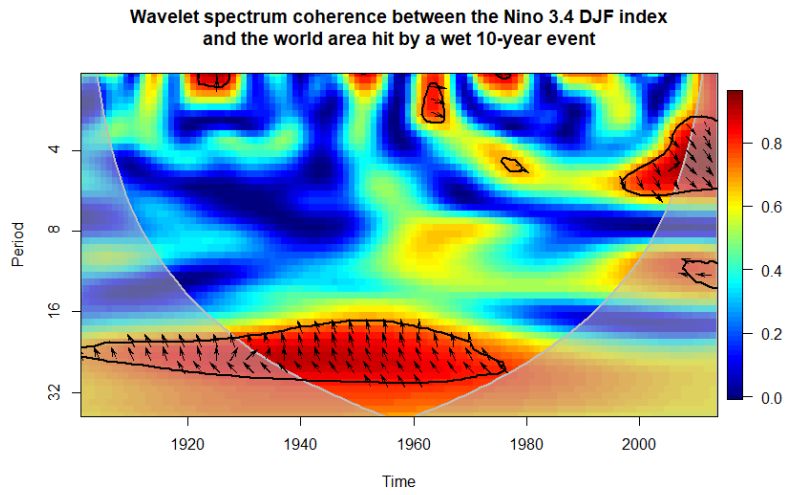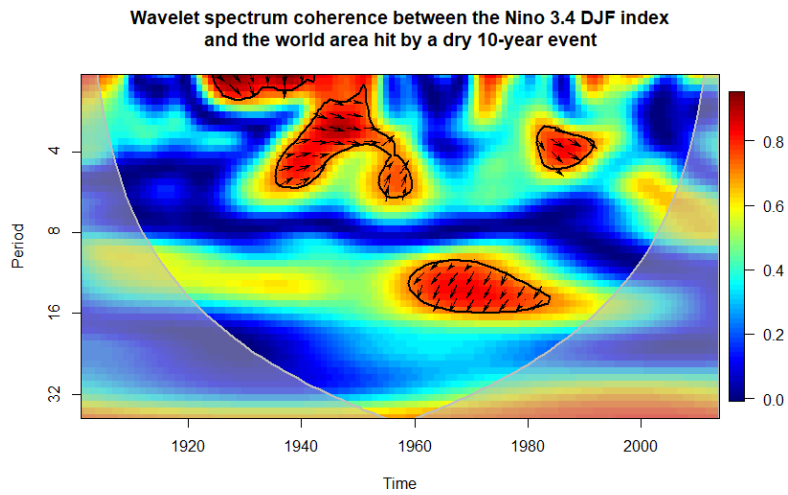

*Figure S10: Wavelet coherence between time series of the Nino3.4 DJF index and world areas*

5 *hit by a 10-year wet or dry (top), wet (middle) or dry (bottom) event*



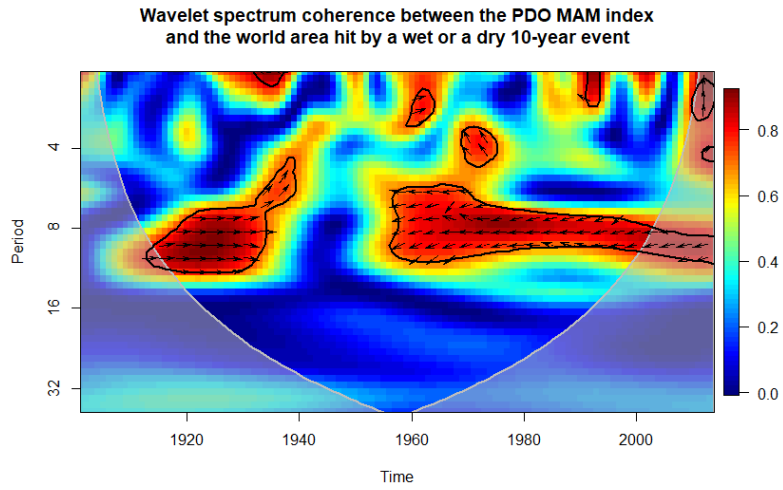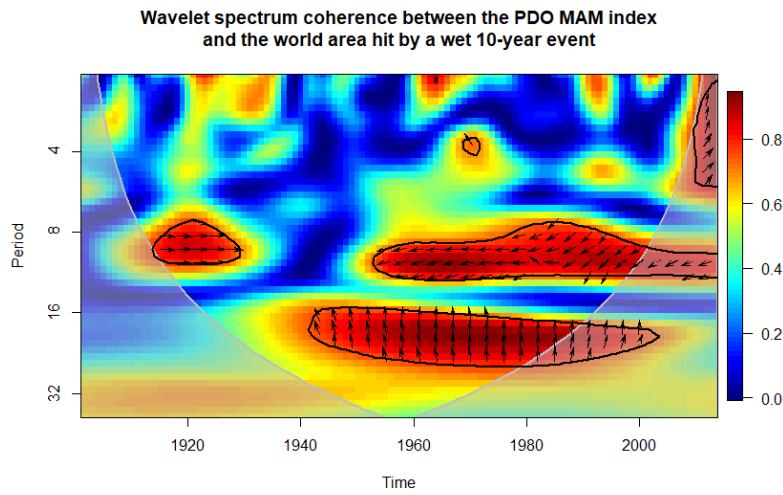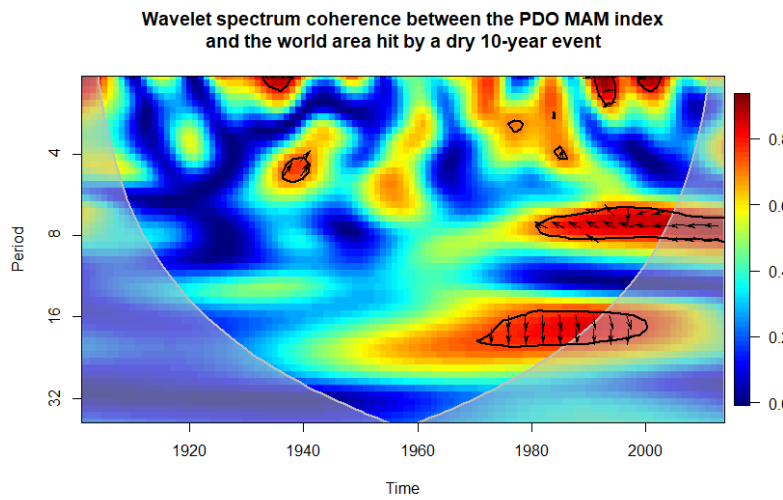

Figure S11: Wavelet coherence between time series of the PDO MAM index and world areas hit

5 by a 10-year wet or dry (top), wet (middle) or dry (bottom) event

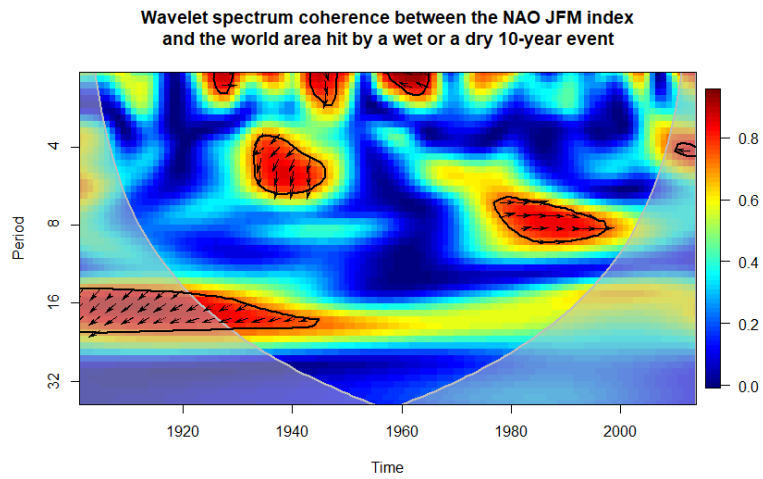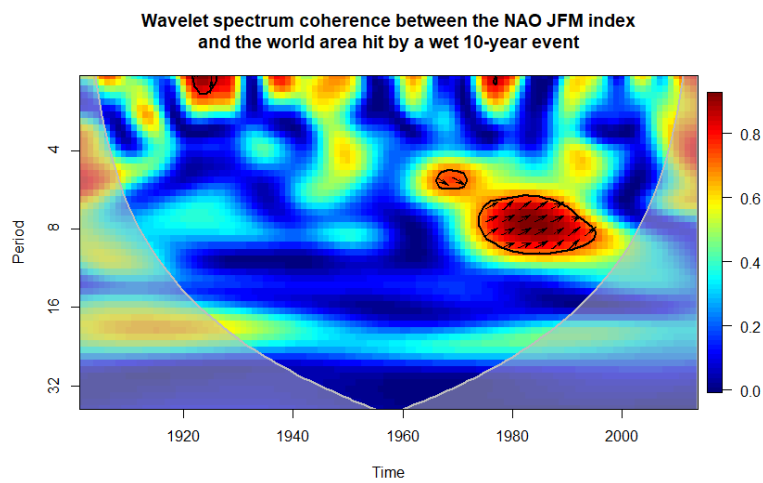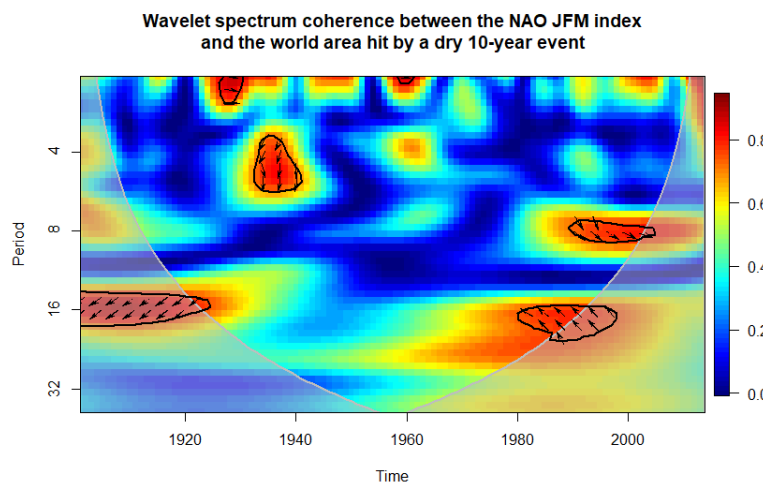

5 *Figure S12: Wavelet coherence between time series of the NAO JFM index and world areas hit by a 10-year wet or dry (top), wet (middle) or dry (bottom) event*

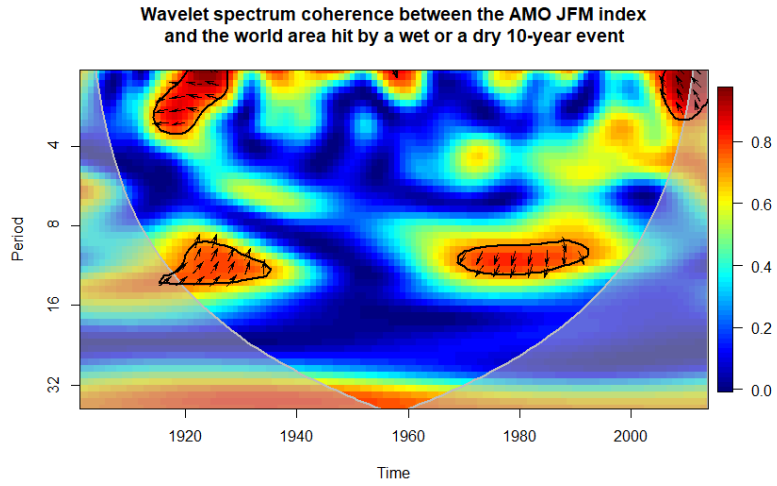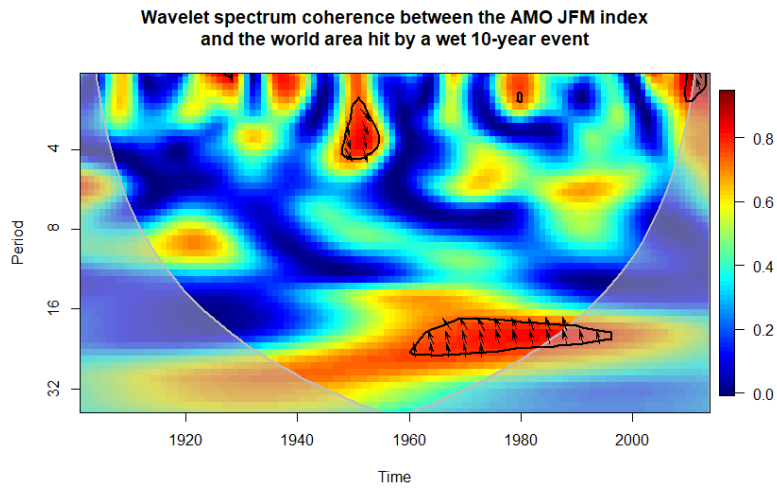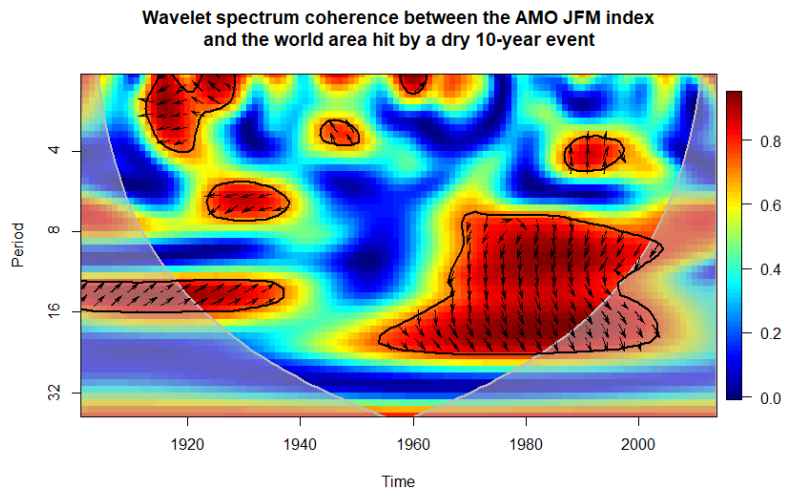

Figure S13: Wavelet coherence between time series of the AMO JFM index and world areas hit

5 by a 10-year wet or dry (top), wet (middle) or dry (bottom) event

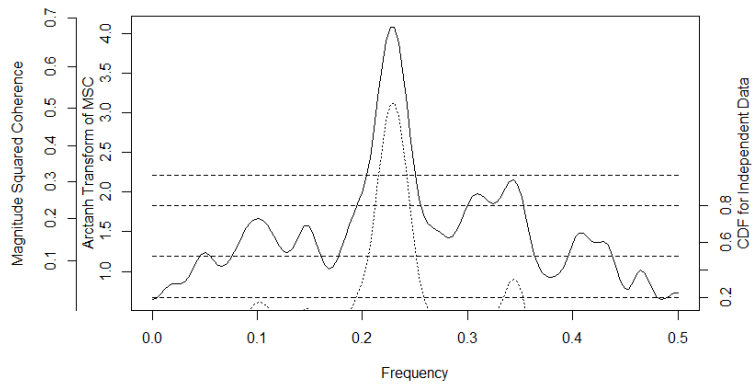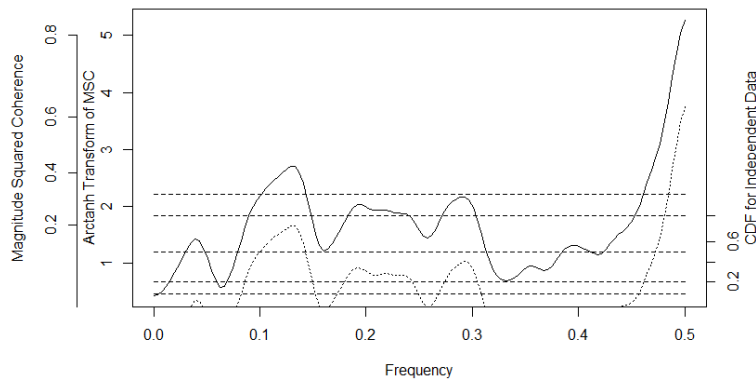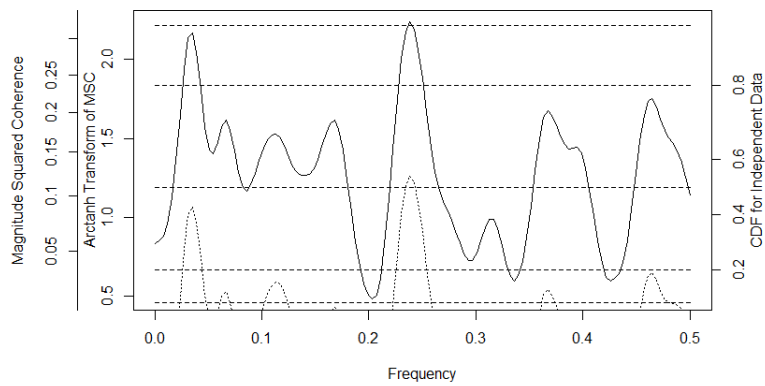

Figure S14: MTM spectrum coherence between the time series of world area hit by a wet or dry ten-year event and the Nino 3.4 DJF index (top), the NAO DJFM index (middle) and the PDO MAM index (bottom)

## Time series of the proportion of 2014 copper production affected by a 12-month event with a 10-year return level

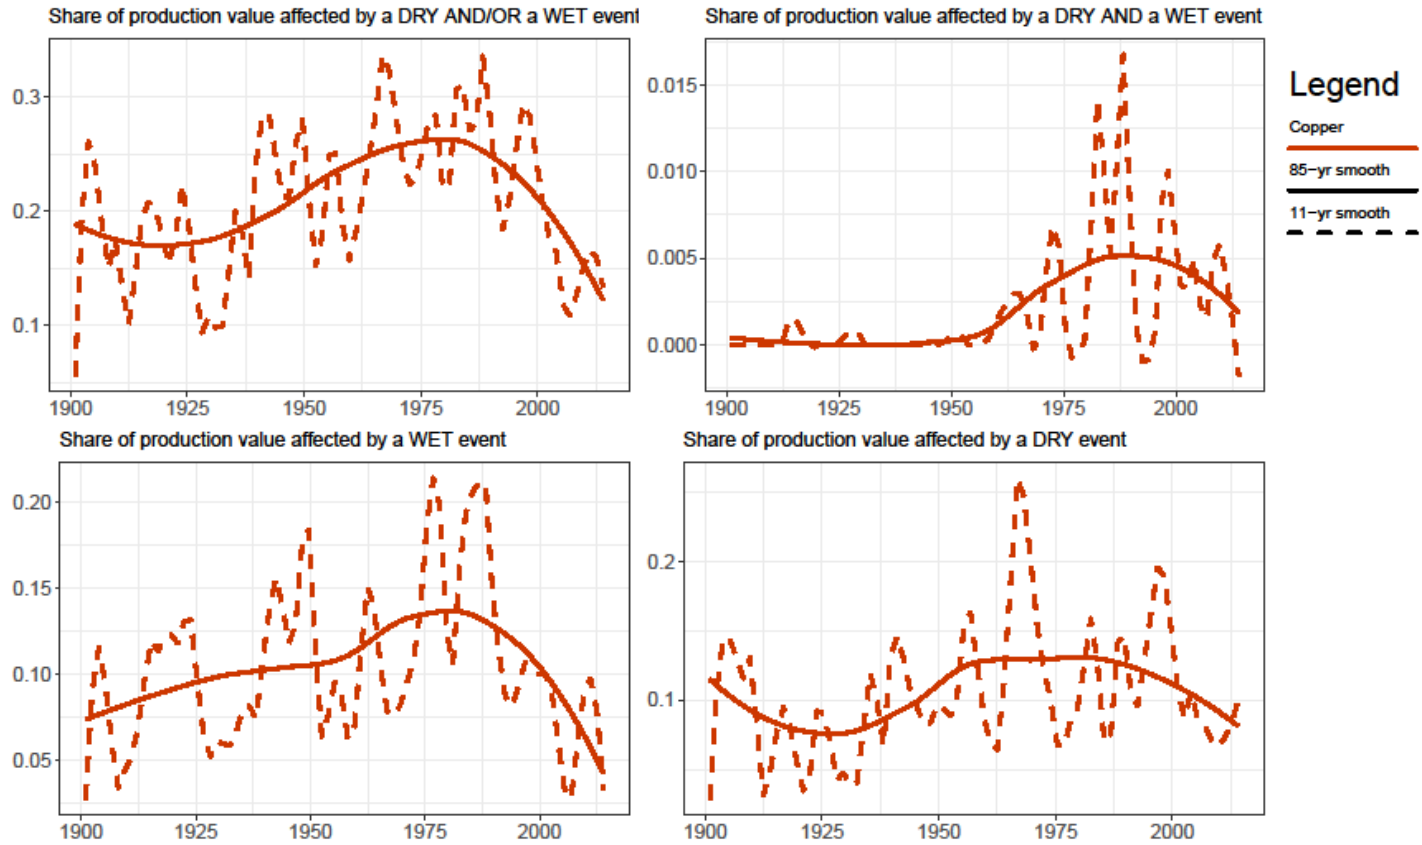

Figure S15: Time series of the proportion of the 2014 copper production affected by a dry or wet event

### Wavelet analysis of the copper mine exposure time series

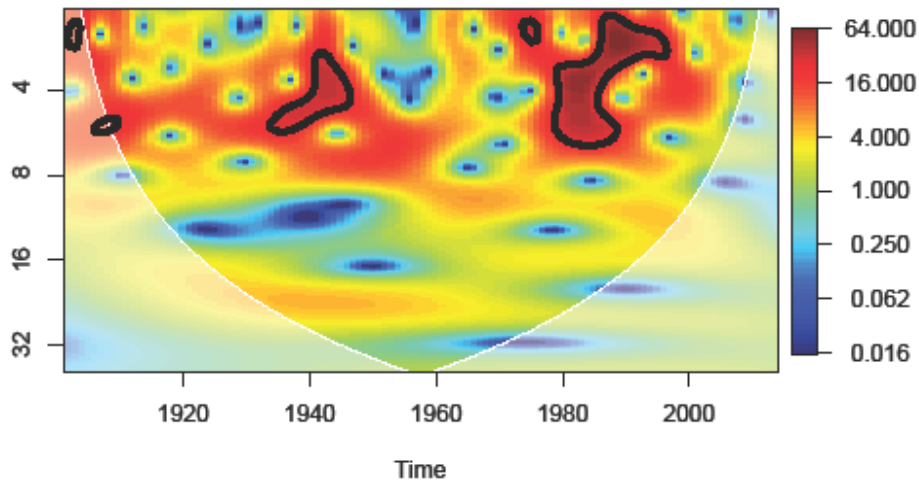

Figure S16: Wavelet analysis of the copper mining exposure time series

### World time series

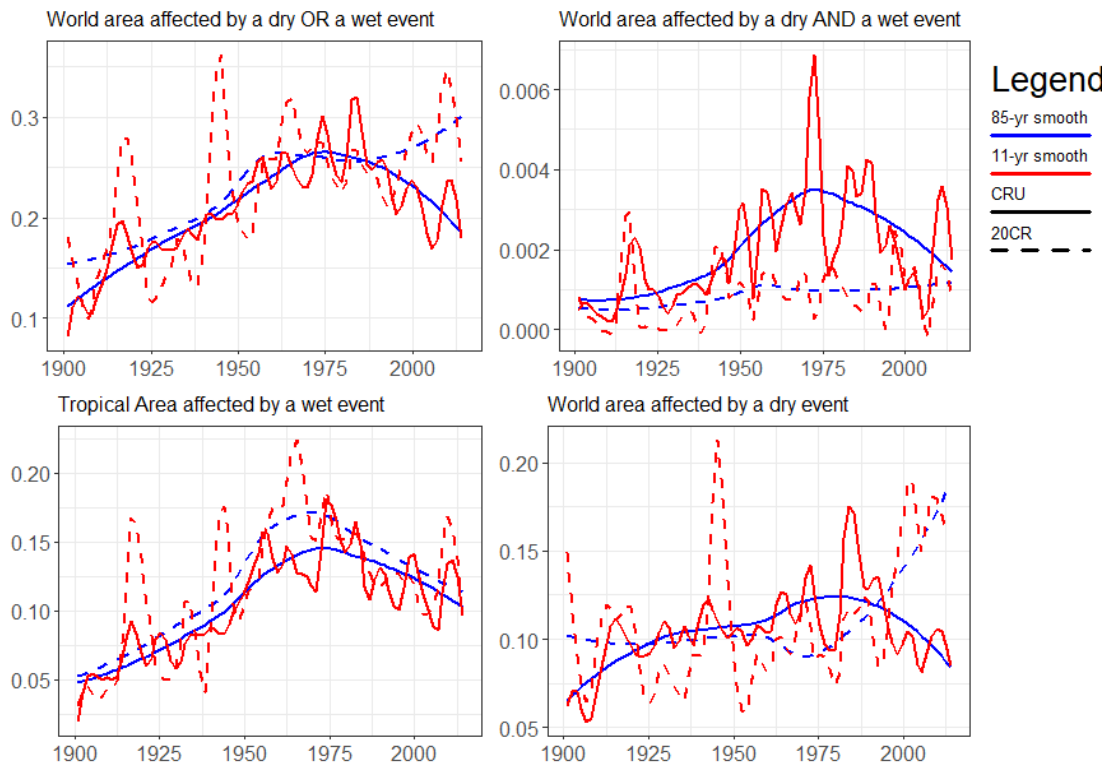

Figure S17: Fraction of land area hit by a 10-year event according to CRU and 20CR SPEI

## Time series of the proportion of the World land area affected by a 12-month event with a 10-year return level

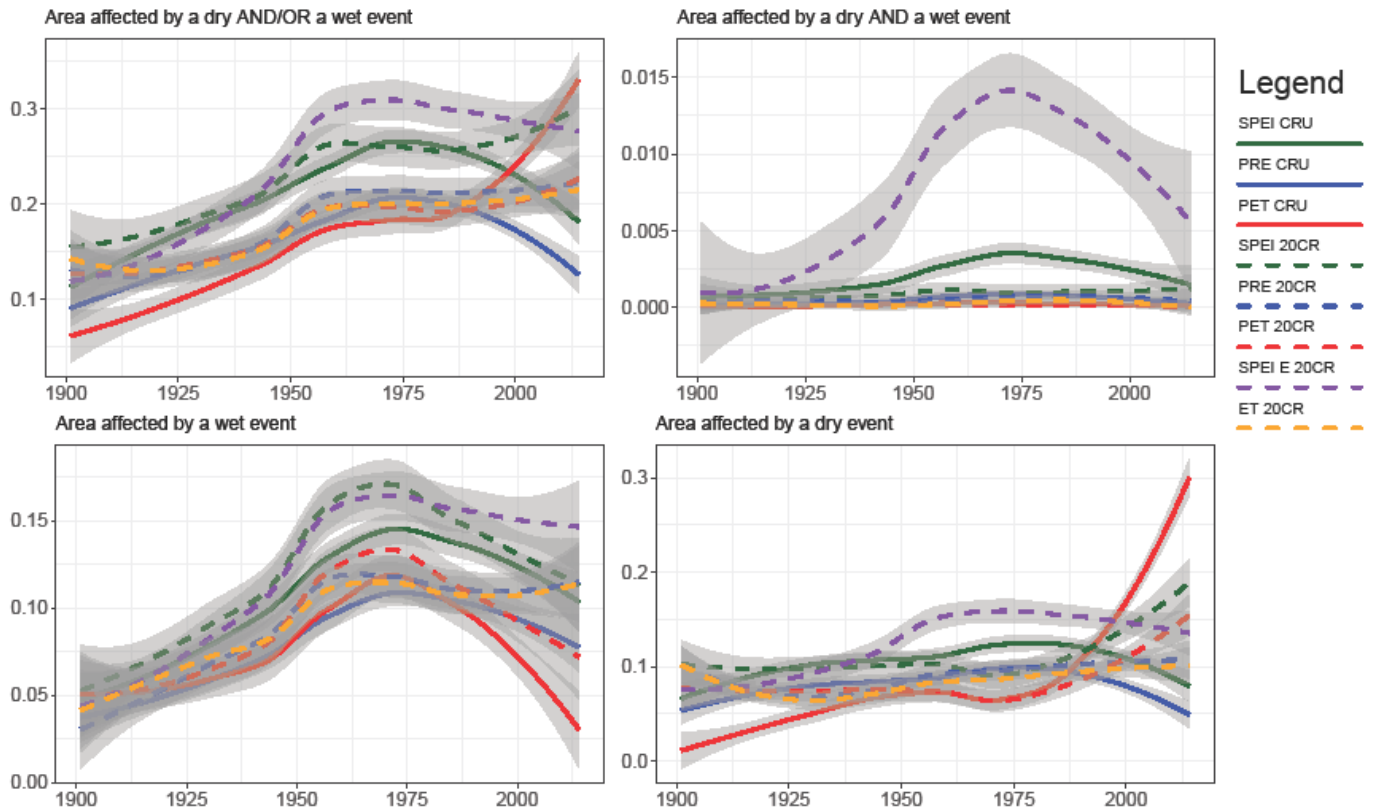

Figure S18: Fraction of land area hit by a 10-year event according to CRU and 20CR data. 85-year smoothing trend of the fraction of land area hit by a 10-year event based on SPEI, precipitation (PRE), potential evapotranspiration (PET), according to CRU and 20CR data, and to evapotranspiration (E) and a version of the SPEI using evapotranspiration instead of potential evapotranspiration (SPEI E) according to 20CR.
